# Supplementary material
Source: publisher figshare collection journal article supplement (https://acs.figshare.com/ndownloader/files/17342333)
Supplement: Supplementary file 1 [file 17342333]

**Supporting Information**

**Target-Specific Prediction of Ligand Affinity with Structure-Based  
Interaction Fingerprints**

*Florian Leidner, Nese Kurt Yilmaz, Celia A. Schiffer\**

Department of Biochemistry and Molecular Pharmacology, University of Massachusetts  
Medical School, Worcester, MA 01605, USA

\*Corresponding author: [celia.schiffer@umassmed.edu](mailto:celia.schiffer@umassmed.edu)

## Figures

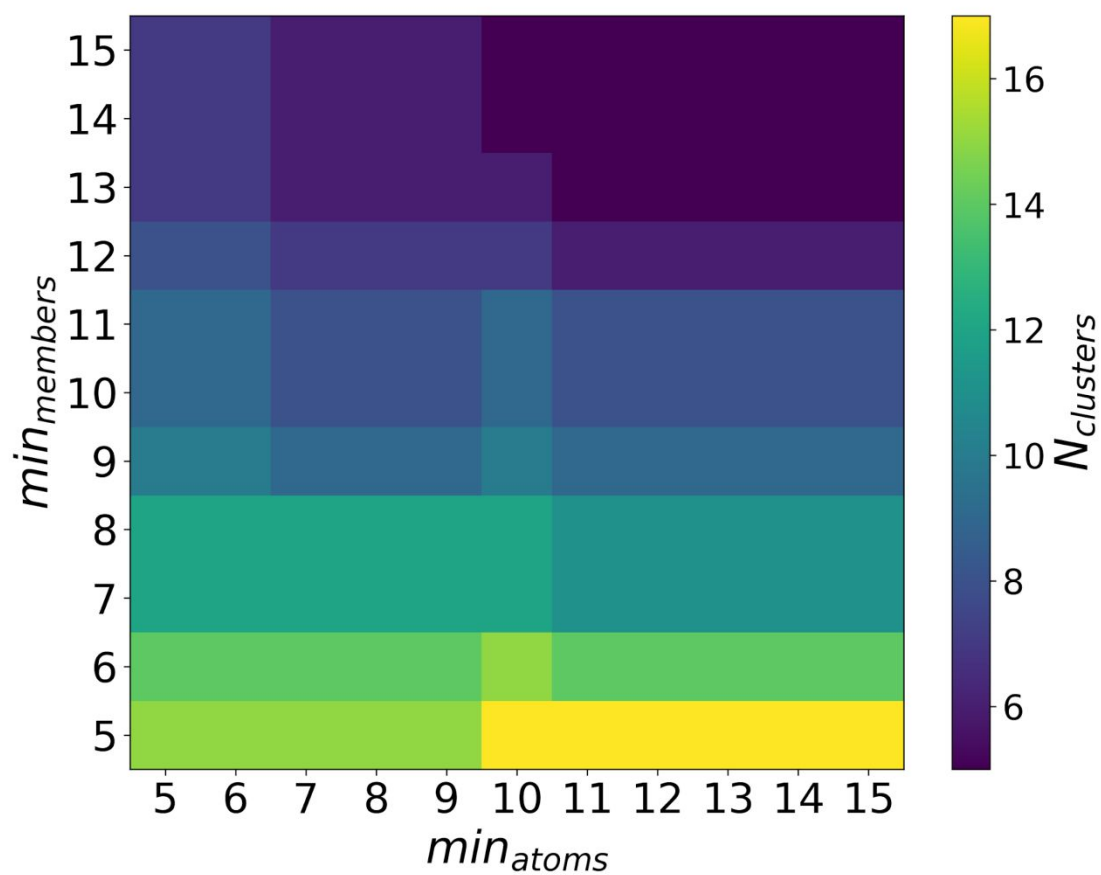

**Figure S1** Effect of clustering parameters on number of clusters. Number of clusters shown as a function of atom threshold and minimum cluster size.

A)

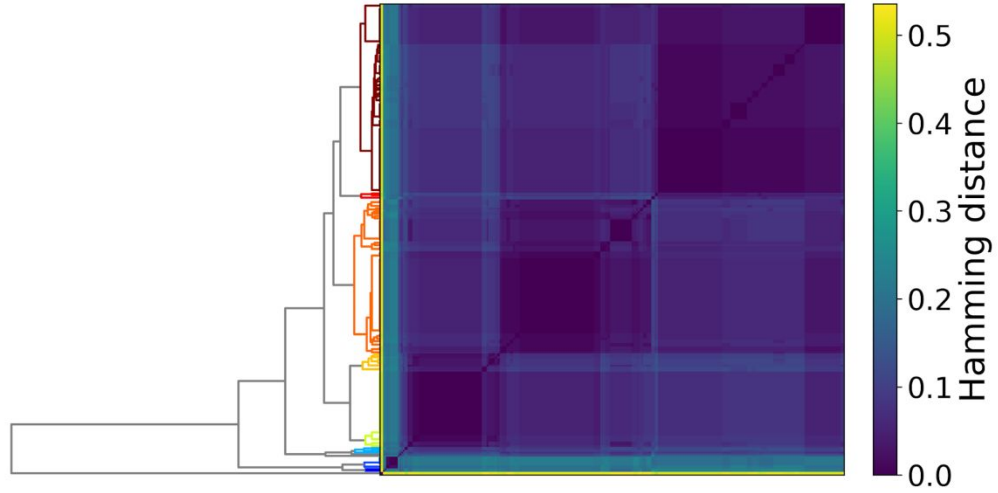

B)

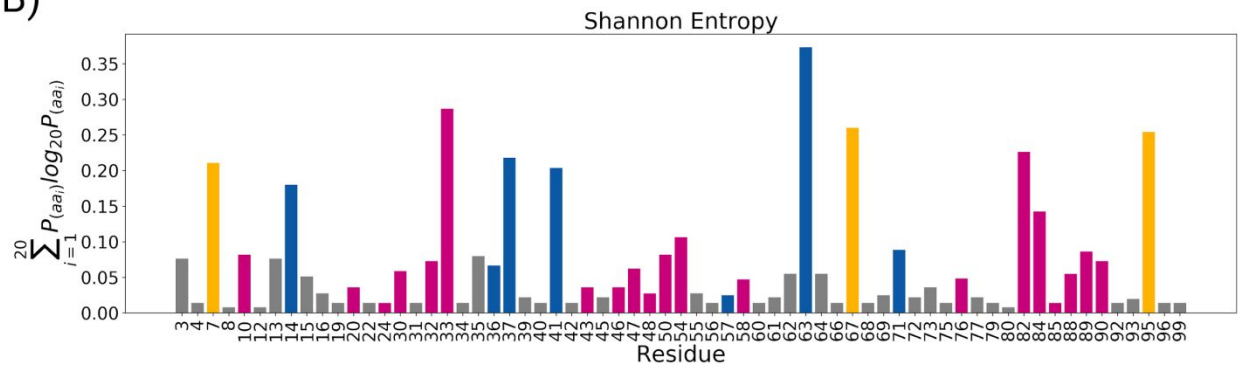

**Figure S2** Sequence diversity of the HIV protease dataset. **A)** Hierarchical clustering of HIV protease sequences by hamming distance. **B)** Per residue sequence variation measured by Shannon entropy. Yellow bars indicate common engineered mutations, blue bars indicate natural polymorphism, purple bars indicate drug resistance associated mutations.

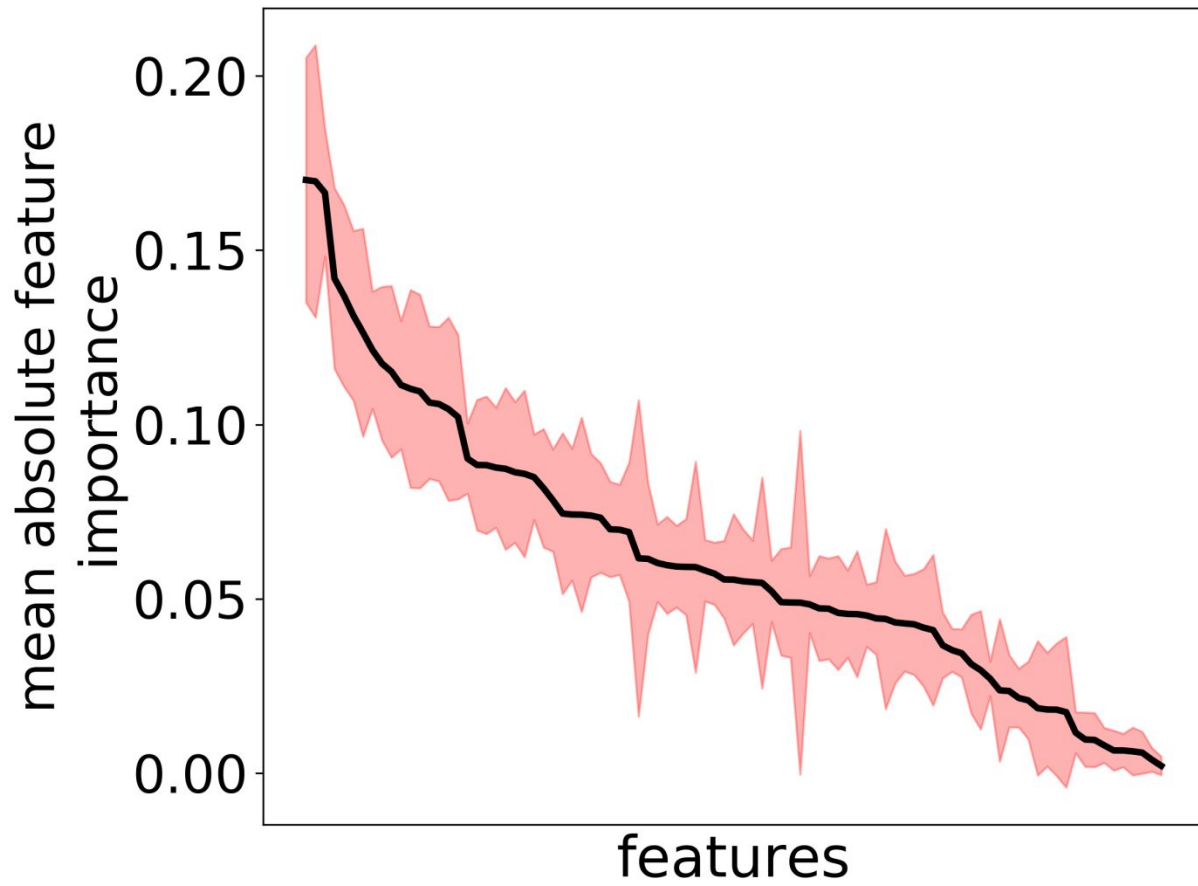

**Figure S3** Global feature importance. Rank ordered mean absolute shapley values averaged across 10 gradient boosting models. Red area indicates average feature importance  $\pm$  standard deviation.

## Tables

**Table S1.** List of hyperparameters for machine learning models used.

| Algorithm                         | Parameter             | Optimized Value    |
|-----------------------------------|-----------------------|--------------------|
| Elastic Net                       | l1_ratio              | 0.5                |
|                                   | alpha                 | 0.00304            |
| Support Vector Machine Regression | kernel                | rbf                |
|                                   | C                     | 29.71              |
|                                   | epsilon               | 0.27               |
|                                   | gamma                 | scale <sup>1</sup> |
| Random Forest                     | n_estimators          | 500                |
|                                   | max_features          | 0.5                |
|                                   | min_impurity_decrease | 0.0018             |
|                                   | max_depth             | 10                 |
| Gradient Boosting Machine         | learning_rate         | 0.063              |
|                                   | max_depth             | 2                  |
|                                   | l2_leaf_reg           | 9                  |
|                                   | bagging_temperature   | 5                  |
|                                   | random_strength       | 73                 |
|                                   | iterations            | 10000              |
|                                   | eval_metric           | RMSE               |

---

<sup>1</sup>  $1/(N \cdot \sigma^2)$  where N is the number of features and  $\sigma^2$  is the feature variance
